# Supplementary material for: Behaviour Change Techniques Used in Mediterranean Diet Interventions for Older Adults: A Systematic Scoping Review
Source: MDPI journal article supplement (doi:10.3390/nu15051189), 2023-02-27
Supplement: s1 [file s1]

Table S2. Characteristics of included studies

| Author, (year), country                | Study design  | Target group/sample/health condition | Study aim                                                                                                                             | Intervention duration | Longitudinal follow-up duration <sup>a</sup> | Sample size, retention at longest follow-up; age: mean $\pm$ SD or mean/median [range]; sex: n (%); BMI: mean $\pm$ SD or mean/median [range]                                                                                                                                       | Outcome(s) and measure(s)                                 | Intervention effect compared to baseline                                                                                                                                                                                                                                                                                                                                                                                                                                                             |
|----------------------------------------|---------------|--------------------------------------|---------------------------------------------------------------------------------------------------------------------------------------|-----------------------|----------------------------------------------|-------------------------------------------------------------------------------------------------------------------------------------------------------------------------------------------------------------------------------------------------------------------------------------|-----------------------------------------------------------|------------------------------------------------------------------------------------------------------------------------------------------------------------------------------------------------------------------------------------------------------------------------------------------------------------------------------------------------------------------------------------------------------------------------------------------------------------------------------------------------------|
| Alonso-Dominiguez et al. (2019), Spain | RCT, parallel | T2D                                  | To assess the effectiveness of a multifactorial intervention for improving adherence to the MD and diet quality among adults with T2D | 3 months              | 9 months (12 months since baseline)          | Sample size: n = 204 (Intervention n = 102, Control n = 102). Retention: Intervention 92.2%, Control 89.2%. Age: Intervention 60.8 $\pm$ 7.8, Control 60.4 $\pm$ 8.4. Sex: Intervention 52F (51.1%), Control 41F (40.2%). BMI: Intervention 29.5 $\pm$ 4.2, Control 30.3 $\pm$ 5.6. | MEDAS, weight, waist circumference, BMI, TC, LDL-c, HDL-c | <u>Post intervention:</u><br>↑ MEDAS (p<0.001)<br>↑ EVOO $\geq$ 4tbsp/day (p<0.001)<br>↑ vegetables $\geq$ 2s/d (p<0.001)<br>↑ fruits $\geq$ 3s/d (p=0.004)<br>↑ fish/seafood $\geq$ 3s/w (p=0.018)<br>↑ nuts $\geq$ 3s/w (p<0.001)<br>↑ white meat more than red meat (p<0.001)<br>↑ sofrito sauce $\geq$ 2s/w (p<0.001)<br>↓ commercial bakery products $\leq$ s/w (p=0.003)<br>↓ waist circumference (p<0.001)<br><br><u>Follow-up:</u><br>↑ MEDAS (p<0.001)<br>↑ EVOO $\geq$ 4tbsp/day (p<0.001) |

|                                                                                 |               |                          |                                                                                                                                                   |           |     |                                                                                                                                                                                                                                                                           |                                                                  |                                                                                                                                                                                                                                                                                                                                                                                                                                                                                                                                                                                                                                          |
|---------------------------------------------------------------------------------|---------------|--------------------------|---------------------------------------------------------------------------------------------------------------------------------------------------|-----------|-----|---------------------------------------------------------------------------------------------------------------------------------------------------------------------------------------------------------------------------------------------------------------------------|------------------------------------------------------------------|------------------------------------------------------------------------------------------------------------------------------------------------------------------------------------------------------------------------------------------------------------------------------------------------------------------------------------------------------------------------------------------------------------------------------------------------------------------------------------------------------------------------------------------------------------------------------------------------------------------------------------------|
| Baguley et al. (2021), Australia                                                | RCT, parallel | Men with prostate cancer | To determine the effects of the MD on cancer-related fatigue and quality of life in men with androgen deprivation therapy treated prostate cancer | 3 months  | N/A | Sample size: n = 23 (Intervention n = 12, Control n = 11). Retention: Intervention 91.6%, Control 90.9%. Age: Intervention 66.6 ± 7.6, Control 65.1 ± 7.9. BMI: Intervention 27.4 ± 3.4, Control 30.6 ± 2.9.                                                              | MEDAS, dietary intake (WDI), IL-6/8, weight, body fat percentage | ↑ nuts ≥3s/w (p<0.001)<br>↑ white meat more than red meat (p=0.004)<br>↑ sofrito sauce ≥2s/w (p=0.004)<br>↑ MEDAS<br>↑ vegetables (p<0.001)<br>↑ PUFA (p=0.043)<br>↑ omega-3 fats (p=0.033)<br>↑ fibre (p<0.001)<br>↓ energy intake (p=0.032)<br>↓ processed meat s/d (p<0.001)<br>↓ dairy s/d (p=0.033)<br>↓ SFA (p<0.001)<br>↓ weight (p<0.001)<br>↓ fat mass (p=0.032)<br>≠ IL-6/8<br>↑ NU-AGE Index (p<0.01)<br>↑ wholegrains (g/day) (p<0.01)<br>↑ fruits (g/day) (p=0.02)<br>↑ vegetables (g/day) (p<0.01)<br>↑ legumes (g/day) (p<0.01)<br>↑ low-fat dairy (g/day) (p<0.01)<br>↑ fish (g/day) (p<0.01)<br>↑ nuts (g/day) (p<0.01) |
| Berendsen et al. (2018), multi-country (Italy, Poland, France, Netherlands, UK) | RCT, parallel | Healthy older adults     | To evaluate if a personally tailored Mediterranean-like dietary pattern is effective for shifting dietary intake                                  | 12 months | N/A | Sample size: n = 1294 (Intervention n = 644, Control n = 650). Retention: 80.4% (Intervention 88.7%, Control 87.7%). Age: Intervention 70.7 ± 4.0, Control 71.1 ± 3.9. Sex: Intervention 248M (43%), Control 26M (46%). BMI: Intervention 26.7 ± 4.1, Control 26.7 ± 3.7. | Dietary intake (7DFR and NU-AGE Index)                           | ↑ NU-AGE Index (p<0.01)<br>↑ wholegrains (g/day) (p<0.01)<br>↑ fruits (g/day) (p=0.02)<br>↑ vegetables (g/day) (p<0.01)<br>↑ legumes (g/day) (p<0.01)<br>↑ low-fat dairy (g/day) (p<0.01)<br>↑ fish (g/day) (p<0.01)<br>↑ nuts (g/day) (p<0.01)                                                                                                                                                                                                                                                                                                                                                                                          |

|                             |               |                      |                                                                                                                                                            |          |                                    |                                                                                                                                                                                                                                                                         |                                                           |                                                                                                                                                                                                                                                                                                                                                                                                                                                              |
|-----------------------------|---------------|----------------------|------------------------------------------------------------------------------------------------------------------------------------------------------------|----------|------------------------------------|-------------------------------------------------------------------------------------------------------------------------------------------------------------------------------------------------------------------------------------------------------------------------|-----------------------------------------------------------|--------------------------------------------------------------------------------------------------------------------------------------------------------------------------------------------------------------------------------------------------------------------------------------------------------------------------------------------------------------------------------------------------------------------------------------------------------------|
|                             |               |                      |                                                                                                                                                            |          |                                    |                                                                                                                                                                                                                                                                         |                                                           | ↑ olive oil (g/day)<br>(p<0.01)<br>↓ alcohol (g/day)<br>(p=0.02)<br>↓ sodium (mg/day)<br>(p=<0.01)<br>↓ sweets (g/day)<br>(p<0.01)<br>↑ MDS (p<0.001)<br>↑ fat (g and %E)<br>(p<0.05)<br>↑ omega-3 fatty acids (g and %E)<br>(p<0.01)<br>↑ omega-6 fatty acids (g and %E)<br>(p<0.01)<br>↑ HDL-c (p<0.05)<br>↑ EPA (p<0.01)<br>↑ DHA (p<0.001)<br>↓ %E CHO<br>(p<0.05)<br>↓ sugar (g)<br>(p<0.05)<br>↓ TG (p<0.001)<br>≠ SFA (%E and g),<br>fibre, TC, LDL-c |
| Bihuniak et al. (2016), USA | Pre/post      | Postmenopausal women | To assess the efficacy of a MD intervention in a group of postmenopausal women in the USA and examine the influence of a MD on cardiovascular risk factors | 6 months | N/A                                | Sample size: n = 22. Retention: 72.7%. Age: 77 ± 6.8. BMI: 25.4 ± 2.9.                                                                                                                                                                                                  | MDS, dietary intake (3DFR), TC, LDL-c, HDL-c, fatty acids | ↑ MDS (p<0.001)<br>↑ fat (g and %E)<br>(p<0.05)<br>↑ omega-3 fatty acids (g and %E)<br>(p<0.01)<br>↑ omega-6 fatty acids (g and %E)<br>(p<0.01)<br>↑ HDL-c (p<0.05)<br>↑ EPA (p<0.01)<br>↑ DHA (p<0.001)<br>↓ %E CHO<br>(p<0.05)<br>↓ sugar (g)<br>(p<0.05)<br>↓ TG (p<0.001)<br>≠ SFA (%E and g),<br>fibre, TC, LDL-c                                                                                                                                       |
| Choi et al. (2019), USA     | RCT, parallel | CVD                  | To evaluate the effectiveness of dietary counselling provided through a custom smartphone app for the implementation and compliance to a MD                | 3 months | 3 months (6 months since baseline) | Sample size: n = 100 (Intervention n = 51, Control n = 49). Retention: 89% (Intervention 88.2%, Control 88.8%). Age: Intervention 57.2 ± 1.8, Control 56.6 ± 1.7. Sex: Intervention 22F (43.1%), Control 17F (34.7%). BMI: Intervention 29.5 ± 0.6, Control 30.8 ± 0.6. | MDS, hs-CRP, weight, BP, TC, TG, LDL-c, HDL-c             | <u>Post-intervention:</u><br>↑ MDS (p>0.05) <sup>c</sup><br>↓ weight (p<0.05)<br>≠ MDS, hs-CRP, BP, TC, TG, LDL-c, HDL-c (all p>0.05)<br><br><u>Follow-up:</u><br>↑ MDS (p<0.001) <sup>c</sup><br>↓ weight (p=0.04)<br>≠ MDS, hs-CRP, BP, TC, TG, LDL-                                                                                                                                                                                                       |

|                                                            |               |                                 |                                                                                                                                       |          |                                      |                                                                                                                                                                                                                            |                                                             |                                                                                                                                                                                                                                                                                      |
|------------------------------------------------------------|---------------|---------------------------------|---------------------------------------------------------------------------------------------------------------------------------------|----------|--------------------------------------|----------------------------------------------------------------------------------------------------------------------------------------------------------------------------------------------------------------------------|-------------------------------------------------------------|--------------------------------------------------------------------------------------------------------------------------------------------------------------------------------------------------------------------------------------------------------------------------------------|
| Chou et al. (2022), Taiwan                                 | RCT, parallel | Healthy older adults            | To investigate the effect of a mini-flipped, game-based MD learning program on dietary behaviour and cognitive function               | 8 weeks  | N/A                                  | Sample size: n = 84 (Intervention n = 43, Control n = 41). Retention: 95.2% (Intervention 95.3%, Control 95.1%). Sex: Intervention 38F (92.7%), Control 29F (74.4%). BMI: Intervention 24.35 ± 3.56, Control 23.99 ± 3.80. | MDS <sup>h</sup>                                            | c, HDL-c (all p>0.05)<br>↑ MDS (p<0.001)                                                                                                                                                                                                                                             |
| Cooper et al. (2022), Australia                            | Pre/post      | Adults with knee osteoarthritis | To determine the feasibility of an anti-inflammatory diet intervention delivered via telehealth for patients with knee osteoarthritis | 9 weeks  | N/A                                  | Sample size: n = 28. Retention: 78.6%. Age: 66 ± 8. Sex: 22F (82%). BMI: 30.6 ± 4.6.                                                                                                                                       | Dietary intake( 24hr recall and 3DFR)                       | ↑ total fat (%E and g) (p<0.05)<br>↑ PUFA (g) (p=0.019)<br>↑ MUFA (g) (p=0.003)<br>↓ CHO (%E and g) (p<0.05)<br>≠ SFA, fibre, vegetables, fruit, wholegrains                                                                                                                         |
| Davis et al. (2017);<br>Murphy et al. (2022),<br>Australia | RCT, parallel | Healthy older adults            | To determine how well healthy older adults in Australia can adopt the MD                                                              | 6 months | 12 months (18 months since baseline) | Sample size: n = 166 (Intervention n = 85, Control n = 81). Retention: Age: Intervention 71.0 ± 4.9, Control 70.9 ± 4.9. Sex: Intervention 57.5%F, Control 55.1%F. BMI: Intervention 26.7 ± 3.7, Control 27.1 ± 4.1.       | MDS <sup>d</sup> , dietary intake (3DFR), serum fatty acids | <u>Post-intervention:</u><br>↑ MDS (p<0.01)<br>↑ EVOO (p<0.001)<br>↑ vegetables (p<0.001)<br>↑ fruit (p<0.001)<br>↑ nuts (p<0.001)<br>↑ legumes (p<0.001)<br>↑ dairy (p<0.001)<br>↑ fish/seafood (p<0.001)<br>↑ %E fat (p<0.01)<br>↑ %E MUFA (p<0.001)<br>↑ MUFA:SFA ratio (p<0.001) |

|                                            |               |                  |                                                                                                  |         |                                    |                                                                                                                                                                                                          |                                                  |                                                                                                                                                                                                                                                                               |
|--------------------------------------------|---------------|------------------|--------------------------------------------------------------------------------------------------|---------|------------------------------------|----------------------------------------------------------------------------------------------------------------------------------------------------------------------------------------------------------|--------------------------------------------------|-------------------------------------------------------------------------------------------------------------------------------------------------------------------------------------------------------------------------------------------------------------------------------|
|                                            |               |                  |                                                                                                  |         |                                    |                                                                                                                                                                                                          |                                                  | ↑ fibre (p<0.001)<br>↑ omega-3 fatty acids (p<0.001)<br>↑ erythrocyte MUFA (p<0.001)<br>↑ DHA (p=0.01)<br>↓ meats (p=0.03)<br>↓ miscellaneous (p<0.001)<br>↓ %E SFA (p<0.001)<br>↓ %E CHO (p<0.001)<br>↓ sugars (p<0.01)<br>↓ sodium (p<0.001)<br>↓ erythrocyte SFA (p<0.001) |
|                                            |               |                  |                                                                                                  |         |                                    |                                                                                                                                                                                                          |                                                  | <u>Follow-up:</u> <sup>e</sup><br>↓ MEDAS (p<.001)<br>↓ legumes (p<.001)<br>↓ vegetables (p=0.03)<br>↓ breads (p<.001)<br>↑ alcohol (p=0.03)<br>↑ discretionary foods (p<.001)<br>↑ SFA (g/MJ/day) (p<.001)                                                                   |
| Droste et al. (2013a); (2013b), Luxembourg | RCT, parallel | Arteriosclerosis | To assess the effect of lifestyle counselling on lipid profile in patients with arteriosclerosis | 4 weeks | 16 weeks (20 weeks since baseline) | Sample size: n = 122 (Intervention n = 60, Control n = 62). Retention: Intervention 88.3%, Control 88.7%. Age: Intervention 63.7 ± 8.1, Control 63.4 ± 10.6. Sex: Intervention 64%M, Control, 69%M. BMI: | Dietary intake (3DFR), BMI, TC, TG, LDL-c, HDL-c | <u>Post-intervention:</u><br>↑ PUFA (g) (p<0.001)<br>↑ fibre (g) (p<0.001)<br>↑ nuts (g) (p<0.001)<br>↑ vegetables (g) (p<0.001)                                                                                                                                              |

|                             |               |                                |                                                                                                                  |           |         |                                                                                                                                                                                                                                                                                         |                                               |                                                                                                                                                                                                                                                                                                                                                                                                                                                                                                                                                                                                                                                                                                                 |
|-----------------------------|---------------|--------------------------------|------------------------------------------------------------------------------------------------------------------|-----------|---------|-----------------------------------------------------------------------------------------------------------------------------------------------------------------------------------------------------------------------------------------------------------------------------------------|-----------------------------------------------|-----------------------------------------------------------------------------------------------------------------------------------------------------------------------------------------------------------------------------------------------------------------------------------------------------------------------------------------------------------------------------------------------------------------------------------------------------------------------------------------------------------------------------------------------------------------------------------------------------------------------------------------------------------------------------------------------------------------|
|                             |               |                                |                                                                                                                  |           |         | Intervention $27.3 \pm 4.5$ ,<br>Control $27.8 \pm 4.2$ .                                                                                                                                                                                                                               |                                               | <p> ↑ tomatoes (p&lt;0.001)<br/> ↓ energy intake (kcal) (p=0.026)<br/> ↓ CHO (g) (p=0.047)<br/> ↓ SFA (g) (p=0.019)<br/> ↓ BMI (p=0.025) </p> <p> <u>Follow-up:</u><br/> ↑ PUFA (g) (p&lt;0.001)<br/> ↑ fibre (g) (p&lt;0.001)<br/> ↑ nuts (g) (p&lt;0.001)<br/> ↑ vegetables (g) (p&lt;0.001)<br/> ↑ tomatoes (p&lt;0.001)<br/> ↓ energy intake (kcal) (p=0.049)<br/> ↓ CHO (g) (p=0.037)<br/> ↓ TC (p=0.023)<br/> ↓ LDL-c (p=0.029)<br/> ↓ LDL:HDL ratio (p=0.024)<br/> ↓ TG (p=0.036) </p> <p> <u>Post-intervention:</u><br/> ↑ MDS (p&lt;0.001)<br/> ↑ MDS Index (p&lt;0.05)<br/> ↓ weight (p&lt;0.05)<br/> ↓ BMI (p&lt;0.05)<br/> ↓ TG (p&lt;0.05) </p> <p> <u>Follow-up:</u><br/> ↑ MDS (p&lt;0.001) </p> |
| Entwistle et al. (2018), UK | RCT, parallel | Thoracic transplant recipients | To assess adherence in thoracic transplant recipients to a dietary intervention known to reduce CVD risk factors | 12 months | 6 weeks | <p>Sample size: n = 41 (Intervention n = 21, Control n = 20). Retention: Intervention 95.2%, Control 95%. Age: Intervention 58 [33-65], Control 59 [27-65]. Sex: Intervention 15M (71%), Control 14M (70%). BMI: Intervention <math>29 \pm 4</math>, Control <math>29 \pm 5</math>.</p> | MDS, MDS Index <sup>i</sup> , weight, BMI, TG | <p> <u>Post-intervention:</u><br/> ↑ MDS (p&lt;0.001)<br/> ↑ MDS Index (p&lt;0.05)<br/> ↓ weight (p&lt;0.05)<br/> ↓ BMI (p&lt;0.05)<br/> ↓ TG (p&lt;0.05) </p> <p> <u>Follow-up:</u><br/> ↑ MDS (p&lt;0.001) </p>                                                                                                                                                                                                                                                                                                                                                                                                                                                                                               |

|                               |                |                                    |                                                                                                                                    |          |          |                                                                                                                                                                                                                                                                                                                                                           |                             |                                                                                                                                                                                                                                                                                                                                                                                                                                                                                                                                                                                                                                                                                                                                                               |
|-------------------------------|----------------|------------------------------------|------------------------------------------------------------------------------------------------------------------------------------|----------|----------|-----------------------------------------------------------------------------------------------------------------------------------------------------------------------------------------------------------------------------------------------------------------------------------------------------------------------------------------------------------|-----------------------------|---------------------------------------------------------------------------------------------------------------------------------------------------------------------------------------------------------------------------------------------------------------------------------------------------------------------------------------------------------------------------------------------------------------------------------------------------------------------------------------------------------------------------------------------------------------------------------------------------------------------------------------------------------------------------------------------------------------------------------------------------------------|
| Estruch et al. (2018), Spain  | RCT, parallel  | Adults at high cardiovascular risk | To assess the efficacy of two MDs (one supplemented with EVOO and one supplemented with nuts) on primary cardiovascular prevention | 5 years  | N/A      | Sample size: n = 7447 (Med diet + EVOO n = 2543, Med diet + nuts n = 2454, Control n = 2450). Age: Med diet + EVOO 67.0 ± 6.2, Med diet + nuts 66.7 ± 6.1, Control 67.3 ± 6.3. Sex: Med diet + EVOO 1493F (58.7%), Med diet + nuts 1326F (54.0%), Control 1463F (59.7%). BMI: Med diet + EVOO 29.9 ± 3.7, Med diet + nuts 29.7 ± 3.8, Control 30.2 ± 4.0. | MEDAS, dietary intake (FFQ) | <p>↑ MDS Index (p&lt;0.05)</p> <p><u>MD + EVOO:</u></p> <p>↑ MEDAS (p&lt;0.001)</p> <p>↑ EVOO (p&lt;0.001)</p> <p>↑ nuts (p&lt;0.001)</p> <p>↑ legumes (p&lt;0.001)</p> <p>↑ fish/seafood (p=0.01)</p> <p>↑ %E fat (p&lt;0.001)</p> <p>↑ %E SFA (p=0.004).</p> <p>↑ %E MUFA (p&lt;0.001)</p> <p>↑ %E PUFA (p&lt;0.001)</p> <p>↓ energy intake (p&lt;0.001)</p> <p><u>MD + Nuts:</u></p> <p>↑ MEDAS (p&lt;0.001)</p> <p>↑ EVOO (p&lt;0.001)</p> <p>↑ nuts (p&lt;0.001)</p> <p>↑ legumes (p&lt;0.001)</p> <p>↑ fish/seafood (p=0.001)</p> <p>↑ fibre (p&lt;0.001)</p> <p>↑ %E fat (p&lt;0.001)</p> <p>↑ %E MUFA (p&lt;0.001)</p> <p>↑ %E PUFA (p&lt;0.001)</p> <p>↓ energy intake (p&lt;0.001)</p> <p><u>Post-intervention:</u></p> <p>↑ fibre (p&lt;0.001)</p> |
| Grimaldi et al. (2018), Italy | Non-randomised | Adults at high cardiovascular risk | To investigate the efficacy and durability of a 3-                                                                                 | 3 months | 9 months | Sample size: n = 116 (Intervention n = 71, Control n = 45).                                                                                                                                                                                                                                                                                               | Dietary intake (7DFR),      |                                                                                                                                                                                                                                                                                                                                                                                                                                                                                                                                                                                                                                                                                                                                                               |

|                               |               |                      |                                                                                                                                         |          |     |                                                                                                                                                                                                                                                                                |                                                                            |                                                                                                                                                                                                                                                                                                                                                                                                                                                                                                                                                                                                           |
|-------------------------------|---------------|----------------------|-----------------------------------------------------------------------------------------------------------------------------------------|----------|-----|--------------------------------------------------------------------------------------------------------------------------------------------------------------------------------------------------------------------------------------------------------------------------------|----------------------------------------------------------------------------|-----------------------------------------------------------------------------------------------------------------------------------------------------------------------------------------------------------------------------------------------------------------------------------------------------------------------------------------------------------------------------------------------------------------------------------------------------------------------------------------------------------------------------------------------------------------------------------------------------------|
|                               | intervention  |                      | month intensive dietary intervention on body weight and metabolic risk factors                                                          |          |     | Retention: Intervention 88.7%, Control 64.4%.<br>Age: Intervention 59 ± 10, Control 56 ± 11. BMI: Intervention 32.3 ± 4.2, Control 32.6 ± 3.9.                                                                                                                                 | weight, BMI, TC, HDL-c, LDL-c, TG                                          | ↓ SFA (g) (p<0.001)<br>↓ weight (p<0.001)<br>↓ HbA1c (p<0.001)<br>↓ triglycerides (p<0.01)<br>↓ BP (p<0.01)<br><br><u>Follow-up:</u><br>↑ fibre (p<0.001)<br>↓ energy (kcal) (p<0.01)<br>↓ total fat (%E and g) (p<0.05)<br>↓ SFA (%E and g) (p<0.001)<br>↓ weight (p<0.001)<br>↓ HbA1c (p<0.001)<br>↓ BP (p<0.001)<br>↑ fish/seafood (p<0.001)<br>↑ poultry (p<0.001)<br>↑ low-fat cheese (p=0.005)<br>↑ seeds (p=0.016)<br>↑ total serum n-3 fatty acids (p=0.001)<br>↓ red and processed meat (p<0.001)<br>↓ full fat dairy (p<0.001)<br>↓ sweets (p<0.001)<br>↓ total serum n-6 fatty acids (p=0.008) |
| Hagfors et al. (2005), Sweden | RCT, parallel | Rheumatoid arthritis | To investigate the efficacy of a MD vs ordinary Western diet for suppression of disease activity and patients with rheumatoid arthritis | 3 months | N/A | Sample size: n = 56 (Intervention n = 29, Control n = 27).<br>Retention: Intervention 89.7%, Control 92.6%.<br>Age: Intervention 58 [33-73], Control 59 [39.75].<br>Sex: Intervention 5M/21F, Control 5M/20F.<br>BMI: Intervention 28.4 [21.5-38.7], Control 25.6 [16.4-31.4]. | Dietary intake (self-report diet questionnaire and diet history interview) |                                                                                                                                                                                                                                                                                                                                                                                                                                                                                                                                                                                                           |



|                                  |               |                      |                                                                                                                                            |          |     |                                                                                                                                                                                                                                                                                                                                                                                     |                                                                                       |                                                                                                                                                     |
|----------------------------------|---------------|----------------------|--------------------------------------------------------------------------------------------------------------------------------------------|----------|-----|-------------------------------------------------------------------------------------------------------------------------------------------------------------------------------------------------------------------------------------------------------------------------------------------------------------------------------------------------------------------------------------|---------------------------------------------------------------------------------------|-----------------------------------------------------------------------------------------------------------------------------------------------------|
| Hardman et al. (2005), Australia | RCT, parallel | Healthy older adults | To investigate the effect of a change of diet to a MD and/or increase in walking-based exercise on cognition over 6-months                 | 6 months | N/A | Sample size: n = 102 (Diet only n = 25, Diet and exercise n = 24, Control n = 27). Retention: Intervention 72%, Diet and exercise 75%, Control 92.6%. Age: Diet only 77.68 ± 7.38, Diet and exercise 76.54 ± 7.37, Control 78.22 ± 5.81. Sex: Diet only 20F, Diet and exercise 17F, Control 18F. BMI: Diet only 28.26 ± 5.37, Diet and exercise 26.64 ± 3.39, Control 29.01 ± 4.90. | MDS <sup>j</sup> , dietary intake (FFQ), TC, hs-CRP, BP, HbA1c                        | ↓ serum n-6:n-3 ratio (p=0.002)<br><u>Diet only:</u><br>≠ MDS, BP, TC, hs-CRP, HbA1c<br><br><u>Diet + exercise:</u><br>≠ MDS, BP, TC, hs-CRP, HbA1c |
| Katsarou et al. (2014), Greece   | RCT, parallel | Hypertension         | To examine the effect and feasibility of a combined intervention of dietary education and stress management on the control of hypertension | 2 months | N/A | Sample size: n = 45 (Intervention n = 21, Control = 24). Retention: Intervention 76.2%, Control 83.3%. Age: Intervention 61.1 ± 10.9, Control 68.9 ± 10.7. Sex: Intervention 43.8%M, Control 35%M. BMI: Intervention 29.08 ± 4.30, Control 29.48 ± 4.41.                                                                                                                            | MDS <sup>k</sup> , BP, BMI                                                            | ≠ MDS, BP, BMI (all p>0.05)                                                                                                                         |
| Keyserling et al. (2016), USA    | Pre/post      | Healthy older adults | To develop and evaluate a dietary, physical activity and weight loss intervention for residents of south-eastern USA                       | 6 months | N/A | Sample size: n = 339. Retention: 74%. Age: 56 ± 0.6. Sex: 260F (77%). BMI: 36 ± 0.5.                                                                                                                                                                                                                                                                                                | Dietary intake (DRA <sup>l</sup> , FVS <sup>m</sup> , DFQA <sup>n</sup> ), weight, BP | ↑ DRA (p<0.001)<br>↑ FV screener (p<0.01)<br>↑ DFQA (p<0.001)<br>↓ weight (p<0.01)<br>↓ BP (p<0.001)                                                |
| Landaetean-Diaz et al.           | RCT, parallel | Adults with MetS     | To investigate how the different                                                                                                           | 3 months | N/A | Sample size: n = 45 (Diet only n = 24, Diet and                                                                                                                                                                                                                                                                                                                                     | MEDAS, dietary                                                                        | <u>Diet only:</u>                                                                                                                                   |

|                                   |               |                      |                                                                                                                                  |           |     |                                                                                                                                                                                                                                                     |                                          |                                                                                                                                                                                                                                                                                                                                                                                                                                                                                                                        |
|-----------------------------------|---------------|----------------------|----------------------------------------------------------------------------------------------------------------------------------|-----------|-----|-----------------------------------------------------------------------------------------------------------------------------------------------------------------------------------------------------------------------------------------------------|------------------------------------------|------------------------------------------------------------------------------------------------------------------------------------------------------------------------------------------------------------------------------------------------------------------------------------------------------------------------------------------------------------------------------------------------------------------------------------------------------------------------------------------------------------------------|
| (2012),<br>Spain                  |               |                      | dimensions of health-related quality of life evolved in metabolic syndrome patients after following a hypocaloric MD             |           |     | exercise n = 21). Retention: Intervention 83.3%, Control 95.2%. Age: Diet only 57.2 ± 0.98, Diet and exercise 59.05 ± 1.22. Sex: Diet only 15F (62.5%), Diet and exercise 13F (61.9%). BMI: Diet only 38.44 ± 1.46, Diet and exercise 37.05 ± 0.72. | intake (3DFR)                            | <p>↑ MEDAS (p&lt;0.05)</p> <p>↑ MUFA (%E) (p&lt;0.05)</p> <p>↓ energy (kcal) (p&lt;0.05)</p> <p>↓ total fat (%E) (p&lt;0.05)</p> <p>↓ SFA (%E) (p&lt;0.05)</p> <p>↓ weight (p&lt;0.05)</p> <p>↓ BP (p&lt;0.05)</p> <p>↓ total cholesterol (p&lt;0.05)</p> <p><u>Diet + exercise:</u></p> <p>↑ MEDAS (p&lt;0.05)</p> <p>↑ MUFA (%E) (p&lt;0.05)</p> <p>↓ energy (kcal) (p&lt;0.05)</p> <p>↓ total fat (%E) (p&lt;0.05)</p> <p>↓ SFA (%E) (p&lt;0.05)</p> <p>↓ BP (p&lt;0.05)</p> <p>↓ total cholesterol (p&lt;0.05)</p> |
| Maher et al. (2020),<br>Australia | Pre/post      | Healthy older adults | To assess the preliminary effect of a virtual health coach for improving physical activity, MD adherence and health risk factors | 3 months  | N/A | Sample size: n = 31. Retention: 90.3%. Age: 56.2 ± 8.0. Sex: 18F (64.3%).                                                                                                                                                                           | MEDAS, weight, BP                        | <p>↑ MEDAS (p&lt;0.001)</p> <p>↓ weight (p=0.01)</p> <p>↓ waist circumference (p=0.003)</p> <p>≠ BP</p>                                                                                                                                                                                                                                                                                                                                                                                                                |
| Marcos-Forniol et al.             | RCT, parallel | ACS                  | To evaluate the efficacy of a secondary CHD                                                                                      | 12 months | N/A | Sample size: n = 127 (Intervention n = 64, Control n = 63).                                                                                                                                                                                         | MDS <sup>j</sup> , dietary intake (FFQ), | <p>↑ MDS (p=0.013)</p> <p>↓ BP (p&lt;0.05)</p> <p>↓ LDL-c (p&lt;0.05)</p>                                                                                                                                                                                                                                                                                                                                                                                                                                              |

|                                         |               |                      |                                                                                                                                                                                 |          |                                     |                                                                                                                                                                                         |                                 |                                                                                                        |
|-----------------------------------------|---------------|----------------------|---------------------------------------------------------------------------------------------------------------------------------------------------------------------------------|----------|-------------------------------------|-----------------------------------------------------------------------------------------------------------------------------------------------------------------------------------------|---------------------------------|--------------------------------------------------------------------------------------------------------|
| (2018),<br>Spain                        |               |                      | prevention programme on risk factor control, adherence to a MD, quality of life, physical function, readmission and mortality in elderly patients with a recent coronary event  |          |                                     | Retention: Intervention 84.4%, Control 82.5%.<br>Age: Intervention 76 [74.1-79.2], Control 75.4 [73.7-78.9]. Sex: Intervention 17F (31.5%), Control 25F (48.1%).                        | BMI, BP, LDL-c, HbA1c           | ↓ HbA1c (p<0.05)<br>≠ BMI (p>0.05)                                                                     |
| Martinez-Rodriguez et al. (2021), Spain | RCT, parallel | Healthy older women  | To evaluate the effect of the addition of aquatic resistance interval training to a nutritional intervention on body composition, body image perception and adherence to the MD | 14 weeks | N/A                                 | Sample size: n = 40 (Intervention n = 20, Control n = 20).<br>Retention: 85%.<br>Age: Intervention 69.6 ± 5.0, Control 67.7 ± 3.6.<br>BMI: Intervention 28.8 ± 4.7, Control 28.2 ± 4.2. | MEDAS                           | ≠ MEDAS (p>0.05)                                                                                       |
| Masumi et al. (2022), Iran              | RCT, parallel | Healthy older adults | To examine the effectiveness of small group education on nutritional knowledge and attitudes towards the MD                                                                     | 4 weeks  | N/A                                 | Sample size: n = 100 (Intervention n = 50, Control n = 50).<br>Retention: 91% (Intervention 92%, Control 90%).<br>Age: Intervention 63.1 ± 3.7, Control 62.3 ± 3.9.                     | MEDAS <sup>g</sup> , BMI and BP | ↑ MEDAS (p<0.001)<br>≠ BMI, BP                                                                         |
| Mayr et al. (2019), Australia           | RCT, parallel | CHD                  | To evaluate the efficacy of a 6-month MD intervention in reducing the incidence of secondary CVD                                                                                | 6 months | 6 months (12 months since baseline) | Sample size: n = 73 (Intervention n = 37, Control n = 36).<br>Retention: Intervention 73.0%, Control 80.6%.<br>Age: Intervention 61.8 ± 9.2, Control 61.8 ± 9.5.                        | MEDAS, dietary intake (7DFR)    | <u>Post-intervention:</u><br>↑ MEDAS (p<0.001)<br>↑ vegetable, tomato (p<0.05))<br>↑ yoghurt (p<0.05)) |

|                                 |               |     |                                                                                                                                          |          |                                     |                                                                                                                                                                                                                                                                                                                                                                                                                                                                       |     |                                                                                                                                                                                                                                                                                                                                                                    |
|---------------------------------|---------------|-----|------------------------------------------------------------------------------------------------------------------------------------------|----------|-------------------------------------|-----------------------------------------------------------------------------------------------------------------------------------------------------------------------------------------------------------------------------------------------------------------------------------------------------------------------------------------------------------------------------------------------------------------------------------------------------------------------|-----|--------------------------------------------------------------------------------------------------------------------------------------------------------------------------------------------------------------------------------------------------------------------------------------------------------------------------------------------------------------------|
|                                 |               |     | events compared with patients on a low-fat diet                                                                                          |          |                                     | Sex: Intervention 27M (79.4%), Control 27M (87.1%). BMI: Intervention $30.7 \pm 5$ , Control $29.1 \pm 5.3$ .                                                                                                                                                                                                                                                                                                                                                         |     | <p> ↑ nuts (p&lt;0.05)<br/> ↑ legumes (p&lt;0.05)<br/> ↑ seafood (p&lt;0.05)<br/> ↑ unsaturated oils (p&lt;0.05)<br/> ↑ olive oil (p&lt;0.05)<br/> ↑ MUFA (%E) (p&lt;0.05)<br/> ↑ PUFA (%E) (p&lt;0.05)<br/> ↑ n-3 (g) (p&lt;0.05)<br/> ↓ processed meat (p&lt;0.05)<br/> ↓ CHO (%E) (p&lt;0.05) </p> <p> <u>Follow-up:<sup>c</sup></u><br/> ↓ MEDAS (p=0.01) </p> |
| McGrattan et al. (2021) Ireland | RCT, parallel | MCI | To evaluate the feasibility, acceptability and implementation of the THINK-MED intervention among older adults with cognitive impairment | 6 months | 6 months (12 months since baseline) | <p> Sample size: n = 15 (THINK-MED baseline n = 5, THINK-MED staged n = 4, Control n = 6).<br/> Retention (post-intervention): 60% (THINK-MED baseline 60%, THINK-MED staged 75%, Control 50%); (12-month follow-up): 40% (THINK-MED baseline 60%, THINK-MED staged 25%, Control 33%).<br/> Age: THINK-MED staged <math>73.7 \pm 12.1</math>, THINK-MED baseline <math>79.2 \pm 5.0</math>, Control <math>75.7 \pm 6.0</math>. Sex: THINK-MED staged 3M (20.0%), </p> | MDS | <p> <u>THINK-MED staged:<sup>c,f</sup></u><br/> ↑ MDS </p> <p> <u>THINK-MED baseline:<sup>c,f</sup></u><br/> ↑ MDS </p>                                                                                                                                                                                                                                            |

|                                                 |                  |     |                                                                                                                                        |           |     |                                                                                                                                                                                                                                                                                                        |                                                                                                                           |                                                                                                                                                                                                                                                                                                                                                                                                                                                                                                        |
|-------------------------------------------------|------------------|-----|----------------------------------------------------------------------------------------------------------------------------------------|-----------|-----|--------------------------------------------------------------------------------------------------------------------------------------------------------------------------------------------------------------------------------------------------------------------------------------------------------|---------------------------------------------------------------------------------------------------------------------------|--------------------------------------------------------------------------------------------------------------------------------------------------------------------------------------------------------------------------------------------------------------------------------------------------------------------------------------------------------------------------------------------------------------------------------------------------------------------------------------------------------|
|                                                 |                  |     |                                                                                                                                        |           |     | THINK-MED baseline<br>4M (26.7%), Control 2M<br>(13.3%). BMI: THINK-<br>MED staged $28.6 \pm 4.8$ ,<br>THINK-MED baseline<br>$26.0 \pm 3.2$ , Control $29.1 \pm 4.1$ .                                                                                                                                 |                                                                                                                           |                                                                                                                                                                                                                                                                                                                                                                                                                                                                                                        |
| Michaelsen<br>et al. (2006),<br>Germany         | RCT,<br>parallel | CAD | To investigate the<br>effect of a MD on<br>markers of<br>inflammation and<br>metabolic risk<br>factors in patients<br>with treated CAD | 12 months | N/A | Sample size: n = 105<br>(Intervention n = 51,<br>Control n = 54. Retention:<br>Intervention 94.1%,<br>Control 98.1%. Age:<br>Intervention $59.0 \pm 8.7$ ,<br>Control $59.8 \pm 8.6$ . Sex:<br>Intervention 79.2%M,<br>Control 75.5%M. BMI:<br>Intervention $26.1 \pm 3.2$ ,<br>Control $27 \pm 2.8$ . | Dietary<br>intake<br>(7DFR),<br>plasma fatty<br>acids, hs-<br>CRP, TC,<br>LDL-c,<br>HDL-c, TG,<br>fasting<br>insulin, BMI | ↑ fruits (p=0.038)<br>↑ low-fat dairy<br>products (p<0.010)<br>↑ wholegrain<br>bread/pasta<br>(p<0.010)<br>↑ fish (p<0.010)<br>↑ walnuts<br>(p<0.010)<br>↑ EPA (p=0.026)<br>↑ DHA (p=0.022)<br>↓ meat/sausages<br>(p<0.010)<br>↓ %E CHO<br>(p=0.034)<br>↓ %E total fat<br>(p=0.011)<br>↓ %E SFA<br>(p<0.001)<br>↓ %E MUFA<br>(p=0.024)<br>≠ vegetables<br>(p=0.067)<br>≠ cakes/sweets<br>(p=0.646)<br>≠ fibre (p=0.399)<br>≠ BMI, hs-CRP,<br>TC, LDL-c, HDL-<br>c, TG, fasting<br>insulin (all p>0.05) |
| Quintana-<br>Navarro et<br>al. (2020),<br>Spain | RCT,<br>parallel | CAD | To investigate the<br>dietary changes<br>and assess both<br>the level of                                                               | 5 years   | N/A | Sample size: n = 1002<br>(Intervention n = 502,<br>Control n = 500.<br>Retention: Intervention                                                                                                                                                                                                         | MEDAS,<br>dietary<br>intake (FFQ)                                                                                         | ↑ MEDAS<br>(p<0.001)<br>↑ %E EVOO<br>(p<0.05)                                                                                                                                                                                                                                                                                                                                                                                                                                                          |

|                                    |               |                                   |                                                                                                                                                                                                                   |           |     |                                                                                                                                                                                     |                                           |                                                                                                                                                                                                                                                                                                |
|------------------------------------|---------------|-----------------------------------|-------------------------------------------------------------------------------------------------------------------------------------------------------------------------------------------------------------------|-----------|-----|-------------------------------------------------------------------------------------------------------------------------------------------------------------------------------------|-------------------------------------------|------------------------------------------------------------------------------------------------------------------------------------------------------------------------------------------------------------------------------------------------------------------------------------------------|
|                                    |               |                                   | adherence and long-term maintenance following a MD versus a low-fat diet                                                                                                                                          |           |     | 89%, Control 81.2%.<br>Age: Intervention 59.7 ± 0.4, Control 59.5 ± 0.4.<br>Sex: Intervention 414M (82.5%), Control 413M (82.6%). BMI: Intervention 31.0 ± 0.1, Control 31.2 ± 0.2. |                                           | ↑ %E fish/seafood (p<0.05)<br>↑ %E nuts (p<0.05)<br>↓ %E red/processed meat (p<0.05)<br>↓ %E cereals (p<0.05)<br>↓ %E commercial bakery products (p<0.05)<br>↓ %E dairy products (p<0.05)<br>↓ %E seed oils (p<0.05)<br>≠ %E vegetables, fruits, legumes, sweet/carbonated drinks (all p>0.05) |
| Rusch et al. (2021), USA           | Pre/post      | Parkinson's disease               | To determine whether adhering to the MD is feasible and induces beneficial changes in gastrointestinal function, intestinal permeability and faecal microbial communities in individuals with Parkinson's disease | 5 weeks   | N/A | Sample size: n = 8. Retention: 100%.<br>Age: 71.4 ± 2.6. Sex: 5M (63%). BMI: 26.7 ± 1.4.                                                                                            | MEDAS, dietary intake (24hr recall)       | ↑ MEDAS (p<0.001)<br>↑ fibre (p=0.027)<br>↑ fat (g and %E) (p<0.05)<br>↑ MUFA (g and %E) (p<0.05)<br>↑ PUFA (%E) (p=0.009)<br>↓ CHO (%E) (p=0.036)                                                                                                                                             |
| Salas-Salvado et al. (2019), Spain | RCT, parallel | Overweight/obese adults with MetS | To evaluate the effect of an intensive weight loss intervention based on an                                                                                                                                       | 12 months | N/A | Sample size: n = 698 (Intervention n = 361, Control n = 337). Retention: Intervention 88.1%, Control 86.6%.                                                                         | Dietary intake (MD questionnaire and FFQ) | ↑ MD questionnaire (p<0.001)<br>↑ MUFA (%E) (p<0.001)                                                                                                                                                                                                                                          |

|                             |               |                                             |                                                                                                                                                                                                                |          |     |                                                                                                                                                                                                                    |                                                                                    |                                                                                                               |
|-----------------------------|---------------|---------------------------------------------|----------------------------------------------------------------------------------------------------------------------------------------------------------------------------------------------------------------|----------|-----|--------------------------------------------------------------------------------------------------------------------------------------------------------------------------------------------------------------------|------------------------------------------------------------------------------------|---------------------------------------------------------------------------------------------------------------|
|                             |               |                                             | energy-restricted MD, physical activity and behaviour support on hard cardiovascular events compared to usual care                                                                                             |          |     | Age: Intervention $66 \pm 5$ , Control $65 \pm 5$ . Sex: Intervention 148M (45%), Control 141M (47%). BMI: Intervention $32.3 \pm 3.4$ , Control $32.6 \pm 3.6$ .                                                  |                                                                                    | ↑ nuts (g/day) (p=0.05)<br>↑ wholegrain cereals (p=0.01)<br>↓ refined cereals (p<0.001)                       |
| Schwartz et al. (2019), USA | RCT, parallel | Cognitive decline (mild dementia, MCI, SCD) | To investigate the efficacy of a behaviour health coaching intervention to increase adherence to behaviours associated with brain health and improve quality of life in patients at risk for cognitive decline | 6 months | N/A | Sample size: n = 40 (Intervention n = 21, Control n = 19). Retention: 92.5%. Age: Intervention $74.7 \pm 10.4$ , Control $74.3 \pm 8.0$ . Sex: Intervention 10M/9F, Control 6M/12F. BMI: Not described.            | MedScore (calculated from FFQ)                                                     | ↑ MedScore (p=0.016)                                                                                          |
| Toobert et al. (2005), USA  | RCT, parallel | Postmenopausal women with T2D               | To evaluate the effects of a Mediterranean lifestyle program versus usual care on behaviour risk factors for CHD in women with T2D                                                                             | 6 months | N/A | Sample size: n = 279 (Intervention n = 163, Control n = 116). Retention: 88%. Age: Intervention $61.1 \pm 8.0$ , Control $60.7 \pm 7.8$ . BMI: Intervention $35.1 \pm 7.7$ , Control $35.6 \pm 8.8$ .              | Dietary intake (FFQ), weight                                                       | ↑ fruit (p<0.001)<br>↑ vegetables (p<0.001)<br>↓ total fat (p<0.001)<br>↓ SFA (p<0.001)<br>↓ weight (p=0.004) |
| Tuttle et al. (2008), USA   | RCT, parallel | MI                                          | To compare a low-fat versus MD on cardiovascular events and survival after first MI                                                                                                                            | 2 years  | N/A | Sample size: n = 101 (Intervention n = 51, Control n = 50). Retention: Intervention 72.5%, Control 72%. Age: Intervention $58 \pm 10$ , Control $57 \pm 10$ . Sex: Intervention 41M (80%), Control 75M (74%). BMI: | Dietary intake (3DFR), hs-CRP, weight, BMI, BP, TG, LDL-c, HDL-c, glucose, insulin | ↑ omega-3 fats (p<0.001).                                                                                     |

|                           |               |                         |                                                                                         |          |     |                                                                                                                                                                                                                                                                 |                              |                                                                                              |
|---------------------------|---------------|-------------------------|-----------------------------------------------------------------------------------------|----------|-----|-----------------------------------------------------------------------------------------------------------------------------------------------------------------------------------------------------------------------------------------------------------------|------------------------------|----------------------------------------------------------------------------------------------|
| Zuniga et al. (2019), USA | RCT, parallel | Breast cancer survivors | To improve adherence to an anti-inflammatory dietary pattern in breast cancer survivors | 6 months | N/A | Intervention 30 ± 5, Control 29 ± 6.<br>Sample size: n = 153 (Intervention n = 76, Control n = 77).<br>Retention: Intervention 78.9%, Control 84.4%.<br>Age: Intervention 55.3 ± 10.3, Control 58.4 ± 8.2.<br>BMI: Intervention 31.2 ± 4.1, Control 32.7 ± 5.2. | MEDAS, dietary intake (3DFR) | ↑ MEDAS (p<0.001)<br>↓ energy intake (p=0.045)<br>≠ %E fat, %E SFA, fibre, fruit, vegetables |
|---------------------------|---------------|-------------------------|-----------------------------------------------------------------------------------------|----------|-----|-----------------------------------------------------------------------------------------------------------------------------------------------------------------------------------------------------------------------------------------------------------------|------------------------------|----------------------------------------------------------------------------------------------|

<sup>a</sup> Time since end of intervention. <sup>b</sup> If no control group, compared to baseline. <sup>c</sup> Compared to baseline. <sup>d</sup> Dietary outcomes are assessed at 4 months. <sup>e</sup> Compared to post-intervention. <sup>f</sup> Study was under-powered and did not test for significance. <sup>g</sup> MEDAS (question on wine intake removed, scores ranging from 0-13). <sup>h</sup> MDS (Chinese version, scores ranging from 0-17). <sup>i</sup> MDS Index (scores from the MDS were rescaled to range from 0-100 to reflect percentage of score achieved). <sup>j</sup> MDS (scores ranging from 0-9). ↑ or ↓ indicates the intervention significantly improved outcomes compared to control and ≠ indicates no significant difference between intervention and control groups.

<sup>k</sup> MDS (scores ranging from 0-55). <sup>l</sup> DRA (scores ranging from 0-52, higher scores indicate higher diet quality). <sup>m</sup> FVS (scores ranging from 0-35, higher scores indicate greater intake from fruit/vegetables). <sup>n</sup> DFQA (scores ranging from 0-24, higher scores indicate greater healthful fat intake).

Abbreviations: %E, percentage of energy; 3DFR, 3-day food record; 7DFR, 7-day food record; ACS, acute coronary syndrome; BMI, body mass index; BP, blood pressure; CAD, coronary artery disease; CHD, coronary heart disease; CHO, carbohydrates; CRF, chronic renal failure; DFQA, dietary fat quality assessment; DHA, docosahexaenoic acid; DRA, dietary risk assessment; EPA, eicosapentaenoic acid; EVOO, extra virgin olive oil; FFQ, food frequency questionnaire; FVS, fruit and vegetable screener; HDL-c, high-density lipoprotein cholesterol; hs-CRP, high sensitivity c-reactive protein; IL, interleukin; LDL-c, low-density lipoprotein cholesterol; MCI, mild cognitive impairment; MD, Mediterranean diet; MDS, Mediterranean Diet Score; MEDAS, Mediterranean Diet Adherence Screener; MetS, metabolic syndrome; MI, myocardial infarction; MUFA, monounsaturated fat; PUFA, polyunsaturated fat; RCT, randomised controlled trial; s/d, servings per day; s/w, servings per week; SCD, subjective cognitive decline; SFA, saturated fat; T2D, type 2 diabetes; TC, total cholesterol; TG, triglycerides; UK, United Kingdom; USA, United States of America; WDI, Wollongong Dietary Inventory.
